## Publisher's Note

*Urologia Internationalis* was founded in 1955 by Prof. Peter A. Narath, Yorktown Heights, N.Y., and Prof. Heinrich Heusser, Basel, and has retained the same title throughout its 50 years of existence. Born of two independent plans to launch international urological journals, *Urologia Internationalis* became the synthesis of both parties' goals and a combined effort on the part of the Editors. Thirteen years later, in 1968, Prof. Georges Mayor, Zurich, succeeded the founders as Editor and continued to develop the journal into a well-established, worldwide organ.

Prof. Dieter Hauri, Zurich, joined the Editorial Board in 1983 as Co-Editor, and in 1988 succeeded Prof. Mayor as Editor. In 1998, he was joined by Prof. Manfred P. Wirth, Dresden, and in 2000 by Prof. Massimo Porena, Perugia, thereby broadening the international editorial basis of the journal and spreading the Editor's workload onto more than one pair of shoulders. Over more than 20 years, we have enjoyed a very successful and friendly collaboration with Prof. Hauri, and we would like to express our sincere gratitude for his untiring efforts on behalf of the journal. His enthusiasm and expertise have enabled the journal to maintain and improve its high standards in both quality and reputation, and take the place it enjoys today. Prof. Hauri has now decided to retire, and we wish him the very best for his future. We hope that he will continue to read and follow the development of *Urologia Internationalis* with interest.

It is with great pleasure that we welcome as Prof. Hauri's successor Prof. Tullio Sulser, Basel, who has already contributed a great deal to *Urologia Internationalis* as a member of the Board of Reviewing Editors. We are certain that his ideas and input will ensure the journal's continued growth in reputation and quality, and look forward to a successful collaboration with him.

Thomas Karger  
Steven Karger
